# Supplementary material for: The Aetiology of Tourette Syndrome and Chronic Tic Disorder in Children and Adolescents: A Comprehensive Systematic Review of Case-Control Studies
Source: MDPI journal article supplement (doi:10.3390/brainsci12091202), 2022-09-06
Supplement: s1 [file s1]

Table S1. Quality assessment of the included studies

| Author (Year) | NOS values |               |          | Study quality |
|---------------|------------|---------------|----------|---------------|
|               | Selection  | Comparability | Exposure |               |
| [26]          | ★★★★☆      | ★☆☆           | ★★★☆☆    | Fair          |
| [27]          | ★★★★☆      | ☆☆            | ★★★☆☆    | Fair          |
| [42]          | ★★★★☆      | ★☆☆           | ★★★☆☆    | Fair          |
| [28]          | ★★★★☆      | ★☆☆           | ★★★☆☆    | Fair          |
| [43]          | ★★★★☆      | ★☆☆           | ★★★☆☆    | Fair          |
| [13]          | ★★★☆☆      | ★☆☆           | ★★★☆☆    | Fair          |
| [34]          | ★★★★★      | ★☆☆           | ★★★☆☆    | High          |
| [14]          | ★★★★☆      | ★★            | ★★★★     | High          |
| [15]          | ★★★★★      | ★★            | ★★★☆☆    | High          |
| [16]          | ★★★★☆      | ★★            | ★★★☆☆    | High          |
| [39]          | ★★★★☆      | ★☆☆           | ★★★☆☆    | Fair          |
| [41]          | ★★★★☆      | ★☆☆           | ★★★☆☆    | Fair          |
| [29]          | ★★★★☆      | ★☆☆           | ★★★☆☆    | Fair          |
| [17]          | ★★★☆☆      | ★★            | ★★★☆☆    | Fair          |
| [35]          | ★★★★☆      | ★☆☆           | ★★★☆☆    | Fair          |
| [36]          | ★★★★☆      | ★☆☆           | ★★★★     | High          |
| [18]          | ★★★☆☆      | ★★            | ★★★☆☆    | Fair          |
| [37]          | ★★★☆☆      | ★☆☆           | ★★★☆☆    | Fair          |
| [19]          | ★★★★☆      | ★★            | ★★★☆☆    | High          |
| [44]          | ★★★☆☆      | ★☆☆           | ★★★☆☆    | Fair          |
| [38]          | ★★★★★      | ★☆☆           | ★★★☆☆    | High          |
| [45]          | ★★★★☆      | ★☆☆           | ★★★☆☆    | Fair          |
| [20]          | ★★★★☆      | ★★            | ★★★☆☆    | High          |
| [21]          | ★★★☆☆      | ★☆☆           | ★★★☆☆    | Fair          |
| [22]          | ★★★★★      | ★☆☆           | ★★★☆☆    | High          |
| [40]          | ★★★★★      | ★☆☆           | ★★★☆☆    | High          |
| [30]          | ★★★★☆      | ★★            | ★★★☆☆    | High          |
| [23]          | ★★★★☆      | ★★            | ★★★☆☆    | High          |
| [24]          | ★★★★☆      | ★☆☆           | ★★★☆☆    | Fair          |
| [31]          | ★★★★☆      | ★☆☆           | ★★★☆☆    | Fair          |
| [25]          | ★★★☆☆      | ★★            | ★★★☆☆    | Fair          |
| [32]          | ★★★★☆      | ★☆☆           | ★★★☆☆    | Fair          |
| [33]          | ★★★★☆      | ★☆☆           | ★★★☆☆    | Fair          |

NOS: Newcastle-Ottawa scale;

★★★☆☆ Represents the number of points given for each domain to do the risk of bias scoring;

★ one point; ☆ zero point.
